# Supplementary material for: Density assessment and reporting for Phlebotomus perniciosus and other sand fly species in periurban residential estates in Spain
Source: PubMed Central journal article supplement (PMC8397643; doi:10.1007/s00436-021-07270-0), 2021-08-18
Supplement: 436_2021_7270_MOESM1_ESM.pdf [file 436_2021_7270_MOESM1_ESM.pdf]

## Supplementary material

Photographs of places where sticky and light traps were placed. A study of sand fly abundance in 29 periurban sites in Murcia City in southeast Spain.

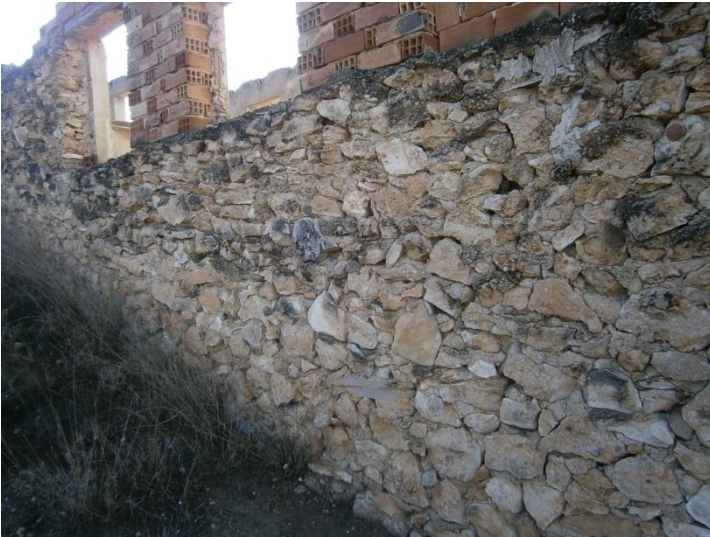

**Photo 01:** Stone wall in an abandoned pig farm (site 1).

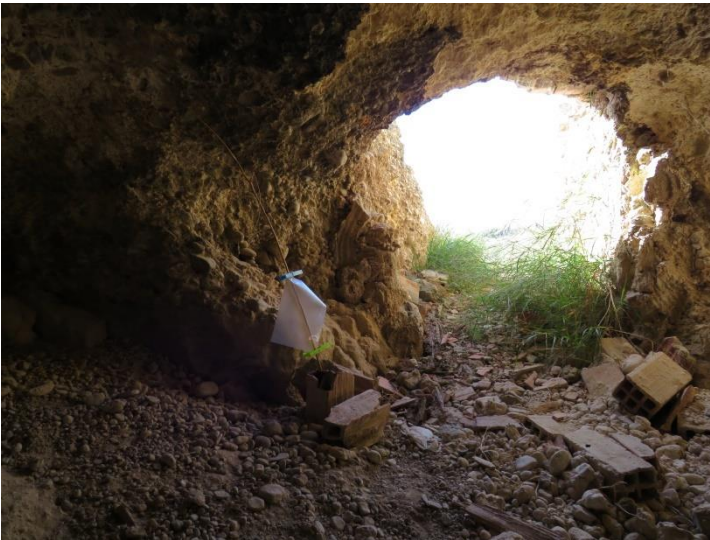

**Photo 02:** Open cave (site 1).

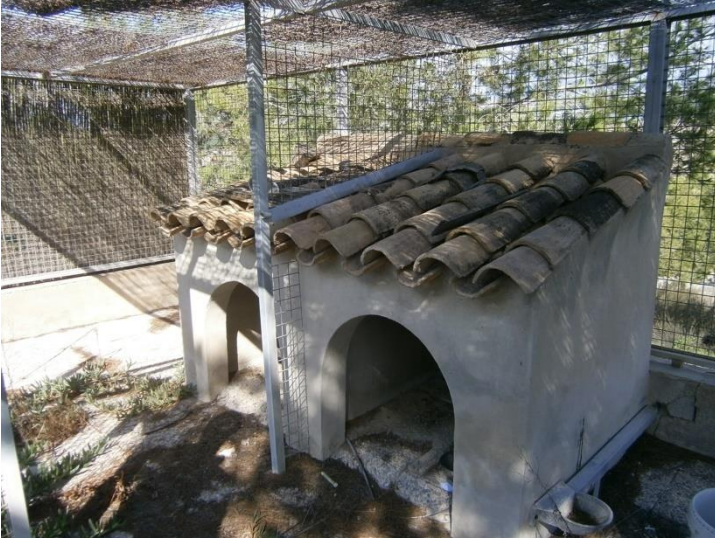

**Photo 03:** Abandoned small, brick dog house (site 6).

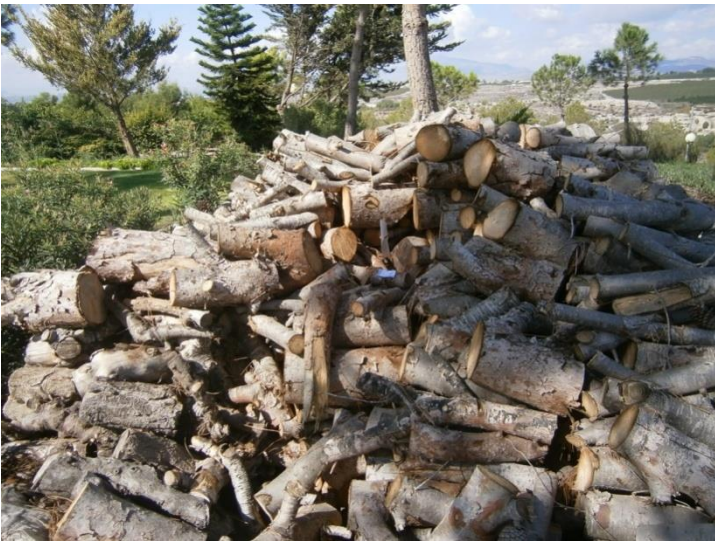

**Photo 04:** Old wood pile (site 6).

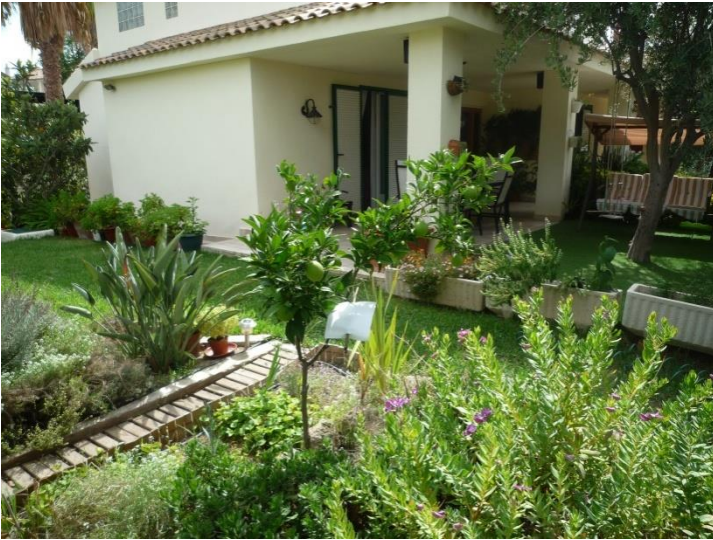

**Photo 05:** Garden (site 15).

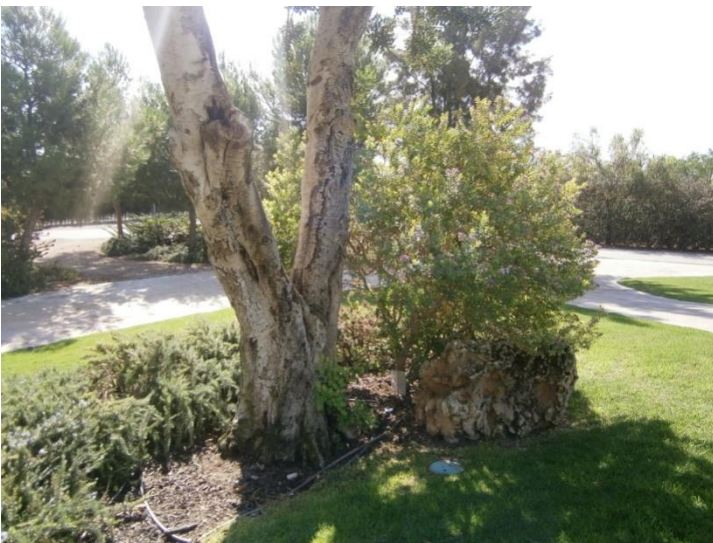

**Photo 06:** Garden (site 7).

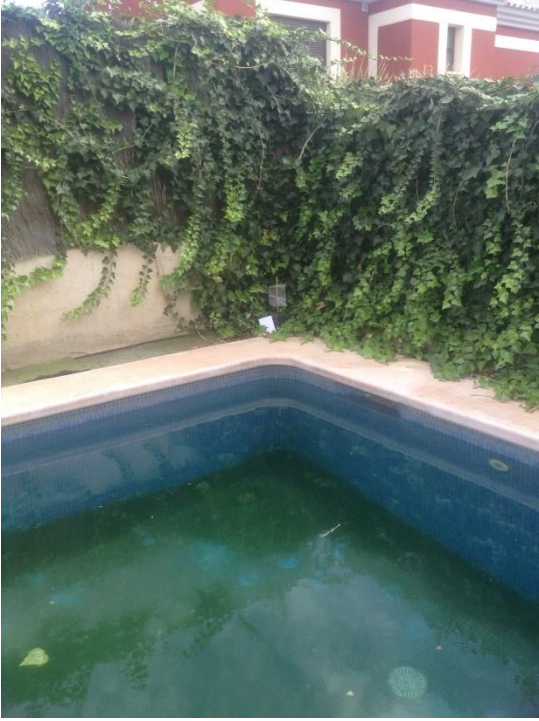

**Photo 07:** Garden (site 7).

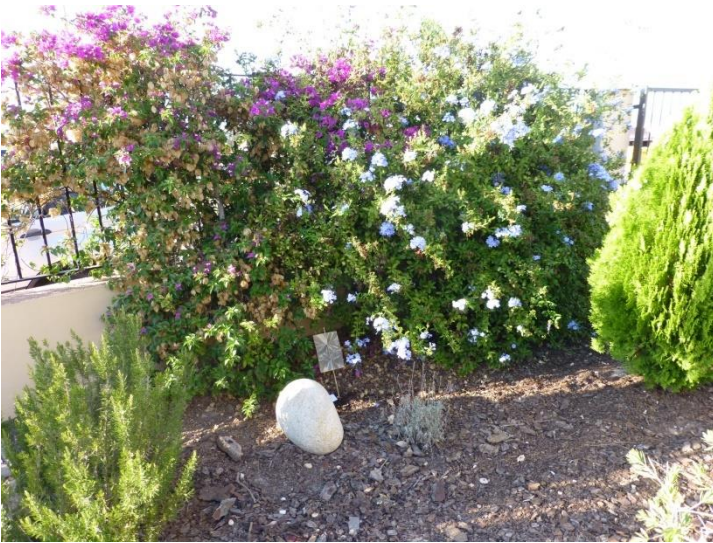

**Photo 08:** Garden (site 3).

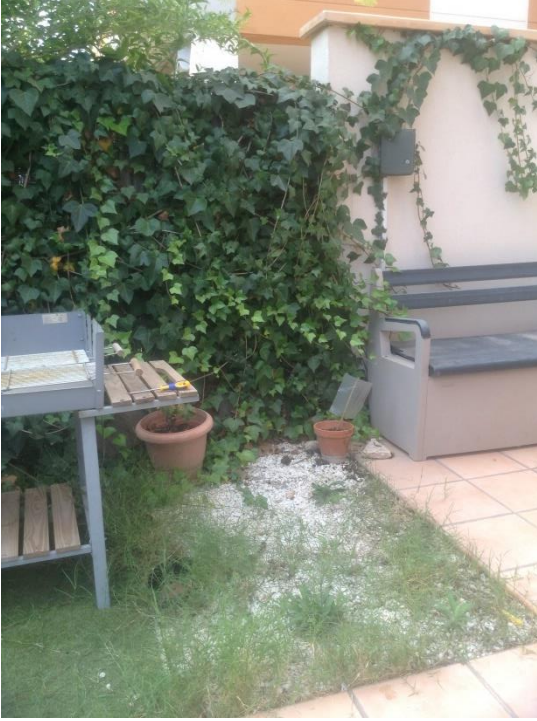

**Photo 09:** Garden (site 16).

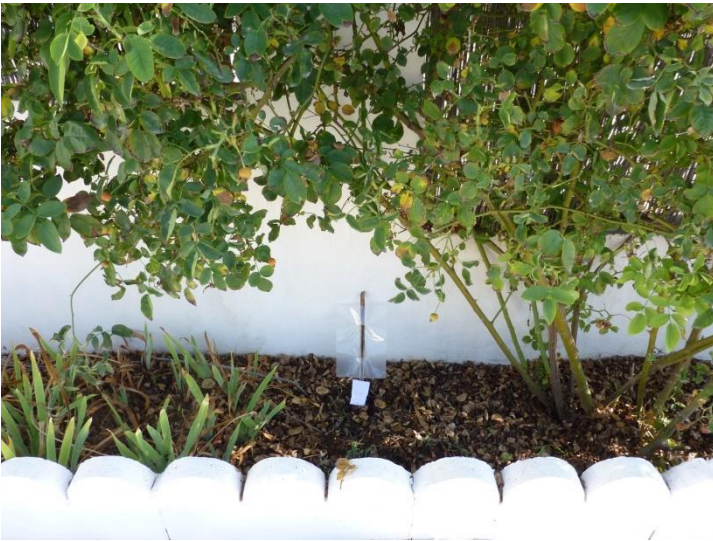

**Photo 10:** Garden (site 2).

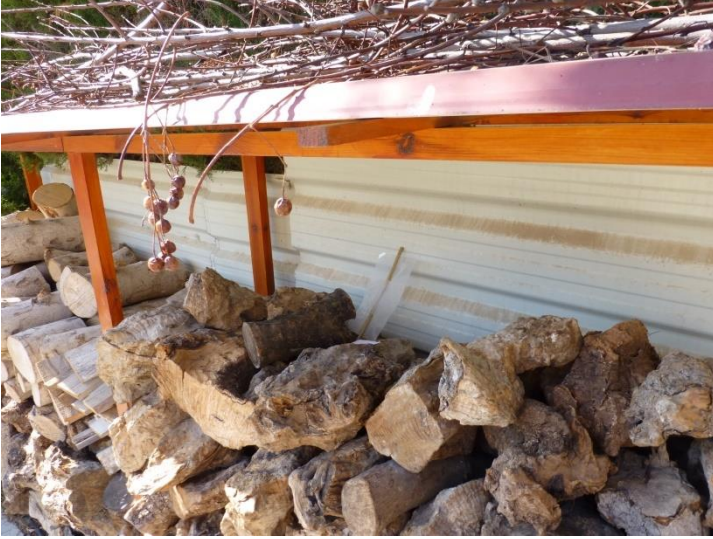

**Photo 11:** Wood pile (site 2).

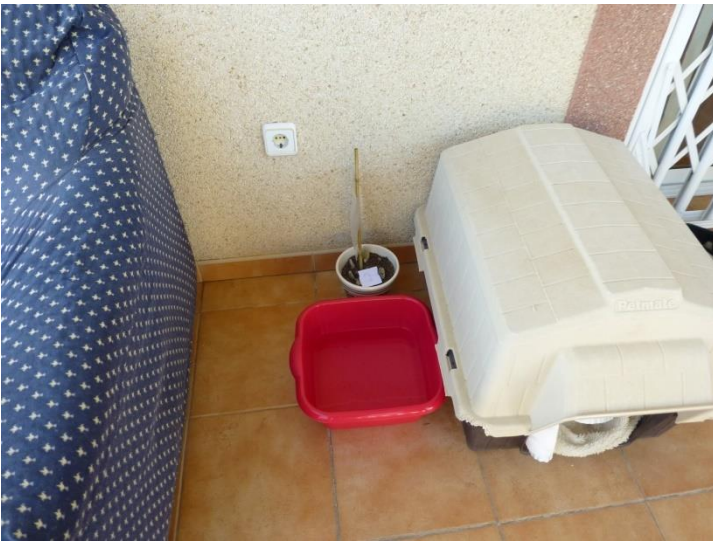

**Photo 12:** Porsche (site 2).

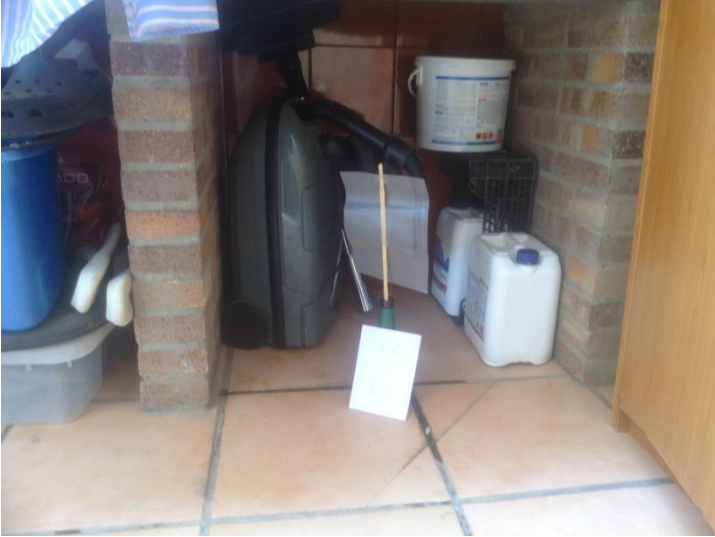

**Photo 13:** Open accessory room (site 8).

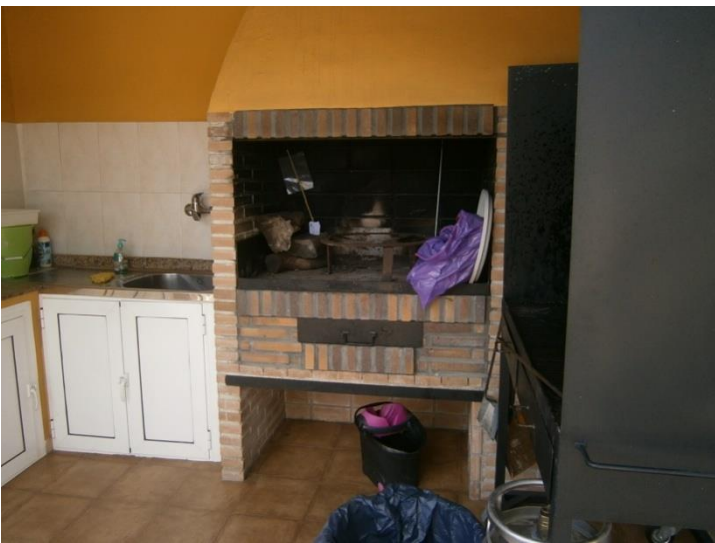

**Photo 14:** Open barbeque room (site 5).

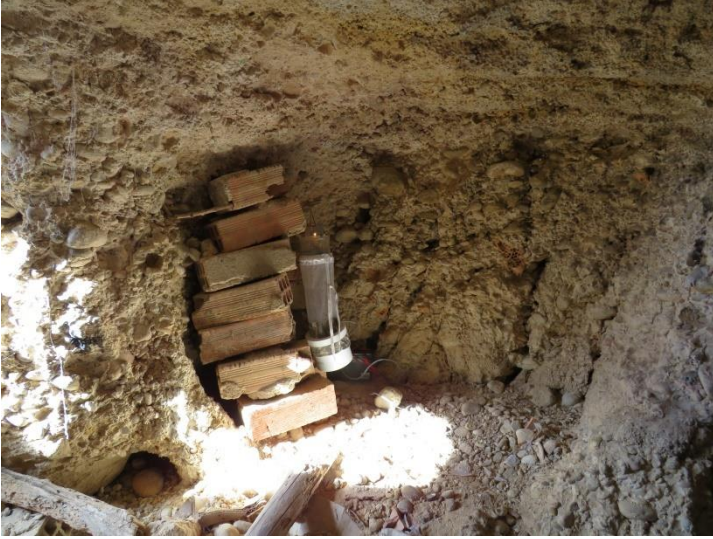

**Photo 16:** Open cave (site 1).

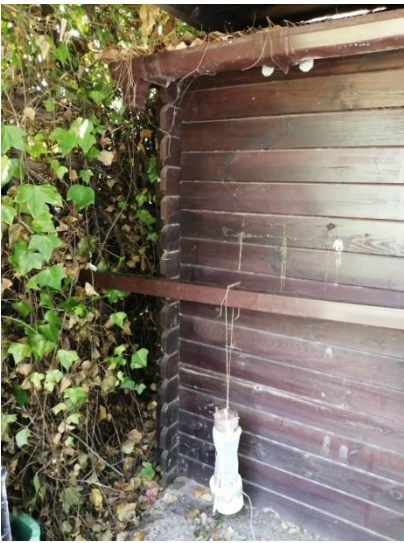

**Photo 17:** Site 3.



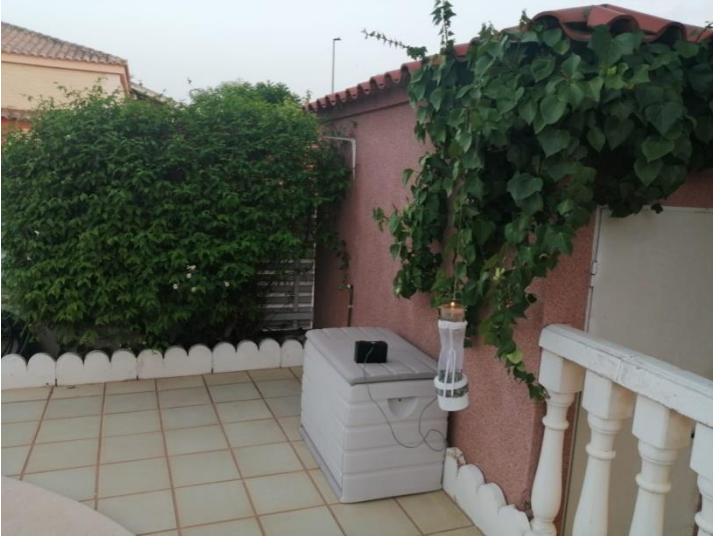

**Photo 18:** Site 2.
